# Supplementary material for: Alkylamine-functionalized hexagonal boron nitride nanoplatelets as a novel material for the reduction of friction and wear
Source: Royal Society of Chemistry journal article supplement (doi:10.1039/c6cp04741f), 2016-01-01
Supplement: c6cp04741f1.pdf [file c6cp04741f1.pdf]

**Supporting Information**

**On**

**Alkylamines-Functionalized Hexagonal Boron Nitride  
Nanoplatelets as Novel Material for Reduction of Friction  
and Wear†**

Sangita Kumari, Om P Sharma and Om P Khatri\*

Chemical Science Division, CSIR-Indian Institute of Petroleum, Mohkampur, Dehradun –  
248005, India

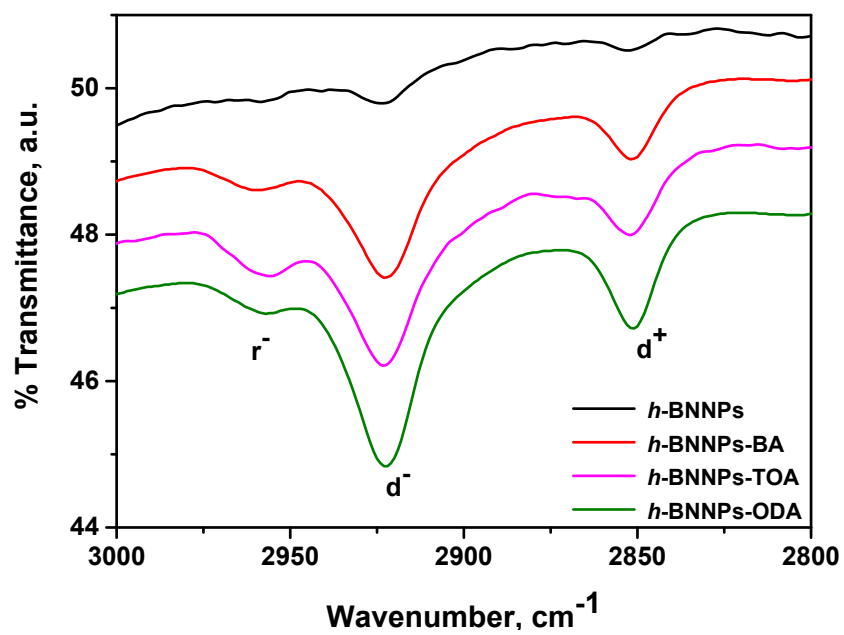

**Figure S1:** FTIR spectra of *h*-BNNPs, *h*-BNNPs-BA, *h*-BNNPs-ODA and *h*-BNNPs-TOA samples highlighting the C-H stretching region.

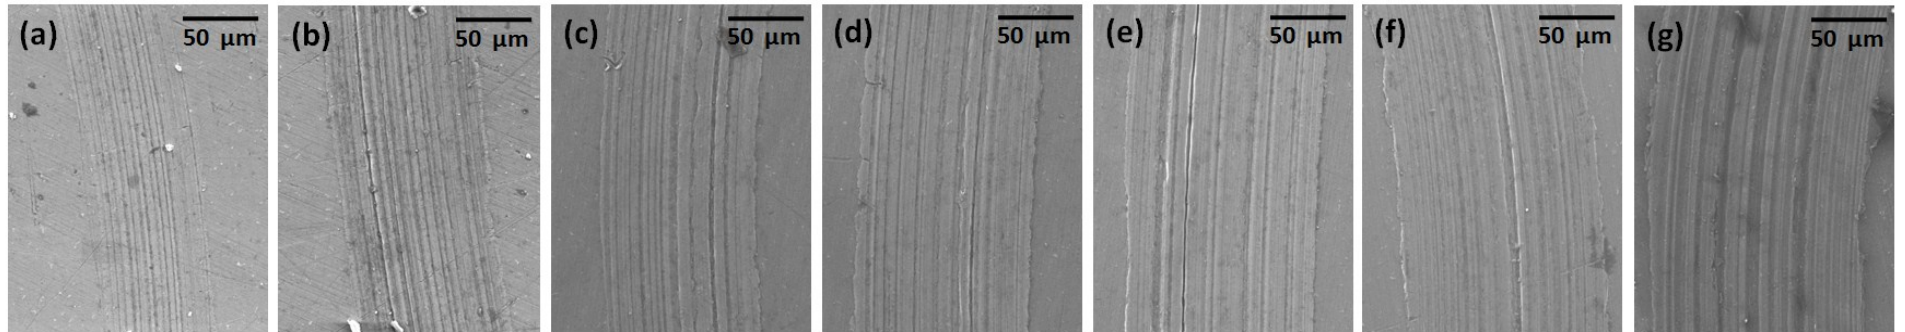

**Figure S2.** Changes in wear track width on the aluminium disc as a function of increasing applied load (a) 100, (b) 200, (c) 300, (d) 400, (e) 500, (f) 600, (g) 700 mN using *h*-BNNPs-TOA-blended mineral lube base oil ( $0.02 \text{ mg.mL}^{-1}$ ). Cyclic speed: 50 rpm and number of cyclic laps: 2000.
